# Supplementary material for: Insights on the Study of Nafion Nanoscale Morphology by Transmission Electron Microscopy
Source: MDPI journal article supplement (doi:10.3390/membranes3040424), 2013-12-16
Supplement: s1 [file s1]

## Supplementary Information

**Figure S1.** Bright field TEM images of acidic Nafion. (a,b) images collected at room temperature with  $500 \text{ e/nm}^2$  at rate  $500 \text{ e/nm}^2 \text{ s}$ ; (a) from initially undamaged sample; (b) after  $10000 \text{ e/nm}^2$ ; (c,d) images collected at cryo-temperature with  $300 \text{ e/nm}^2$  at rate  $300 \text{ e/nm}^2 \text{ s}$ ; (c) from initially undamaged sample; (d) after  $5000 \text{ e/nm}^2$ .

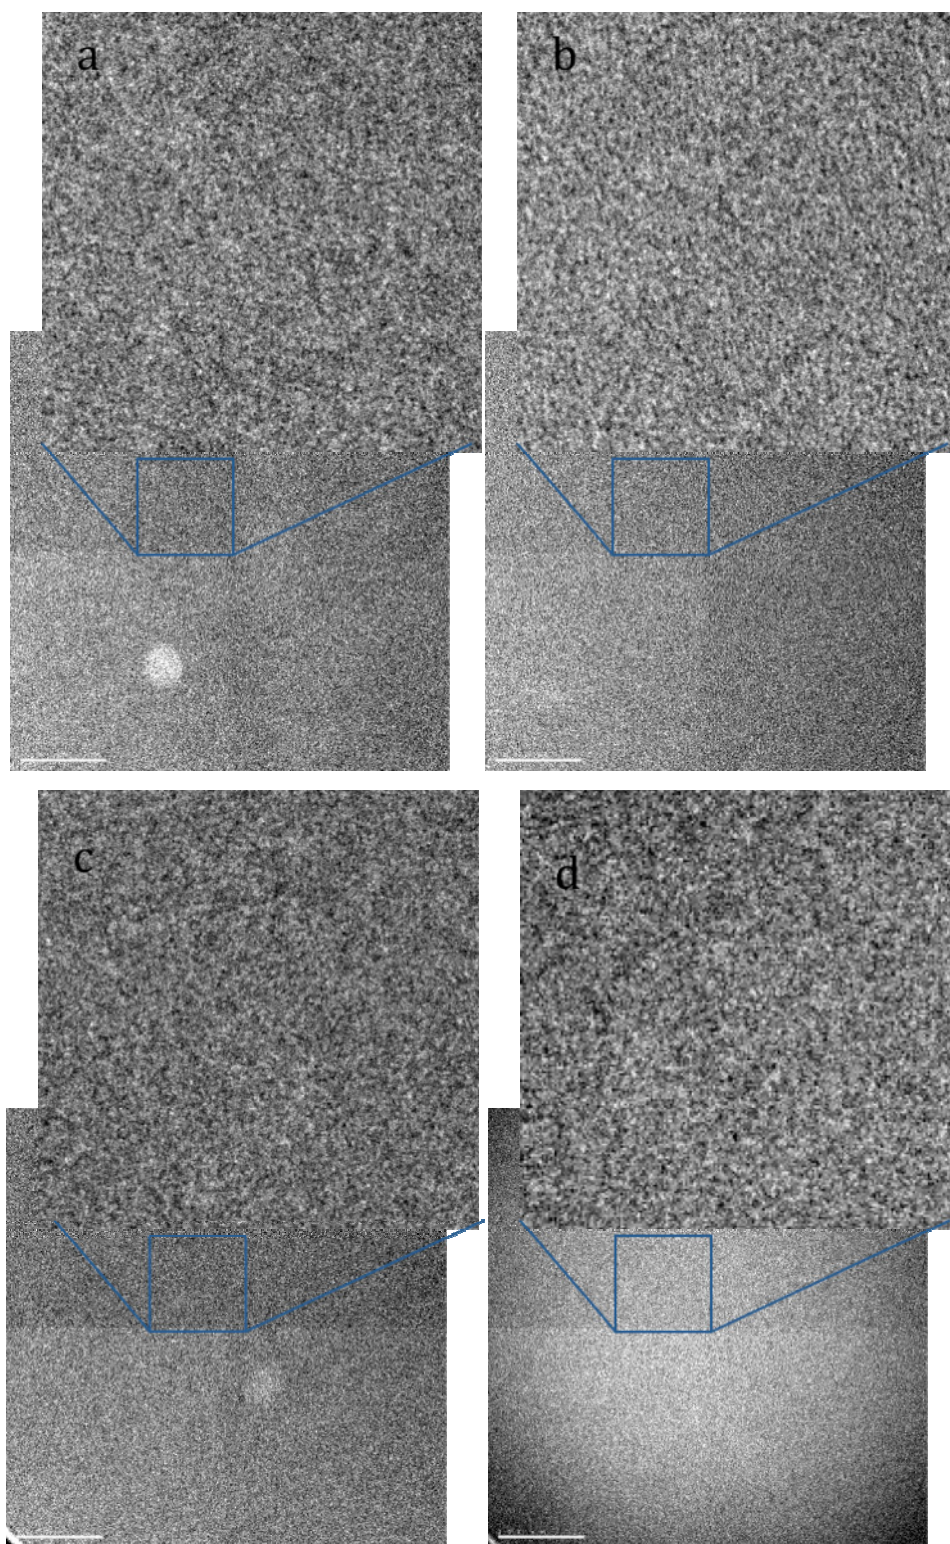

**Figure S2.** Artifacts in Nafion caused by extended beam irradiation. Sample was exposed to the dose rate of  $10000 \text{ e/nm}^2 \text{ s}$  for one minute, resulting in small mass loss after initial thinning but the appearance of substantial phase separation.

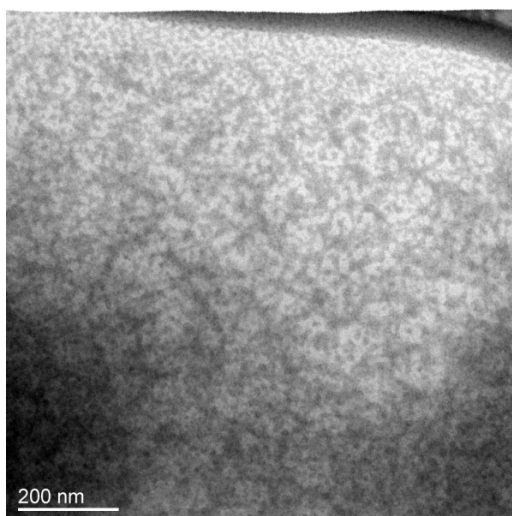

© 2013 by the authors; licensee MDPI, Basel, Switzerland. This article is an open access article distributed under the terms and conditions of the Creative Commons Attribution license (<http://creativecommons.org/licenses/by/3.0/>).
